# Supplementary material for: Cytokine loaded layer-by-layer ultrathin matrices to deliver single dermal papilla cells for spot-by-spot hair follicle regeneration
Source: Royal Society of Chemistry journal article supplement (doi:10.1039/c5tb02265g), 2015-12-10
Supplement: c5tb02265g4.pdf [file c5tb02265g4.pdf]

## Supporting Information

### Supplementary Figures

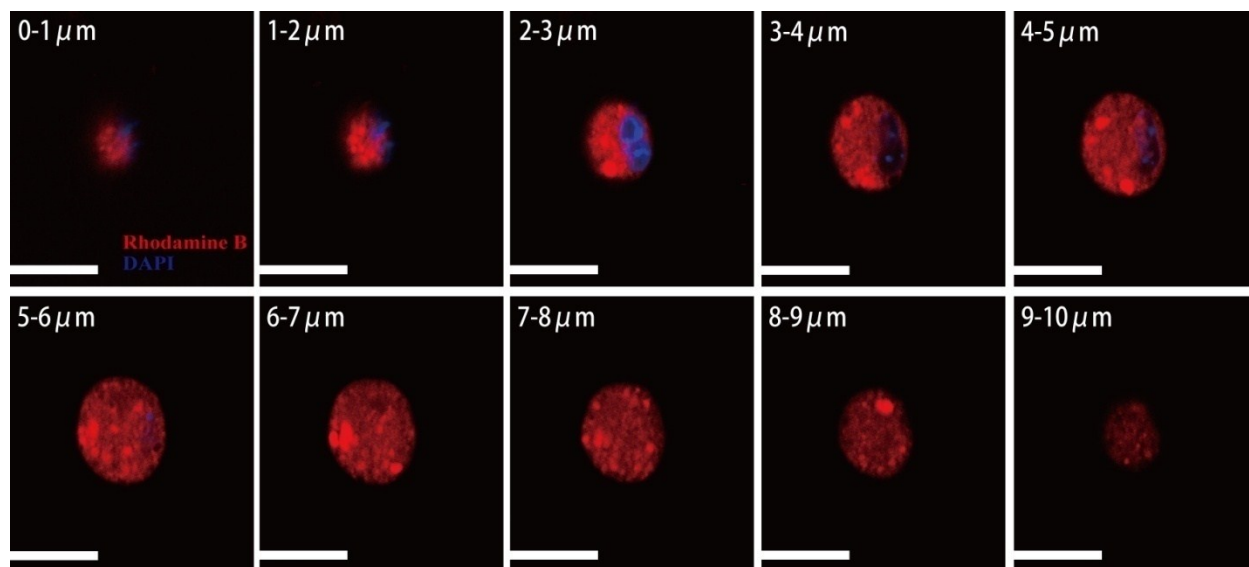

**Figure S1.** Using the CLSM imaging, a 3D scanning was performed, where DPCs were encapsulated with gelatin and alginate-rhodamine B. Sections presented a homogenous nano-coating around DPC through the whole scanning. (Red: alginate-rhodamine B; blue: DAPI). Scale bars: 10 μm.

Supplementary Tables

**Table S1. Loading efficiency of FGF-2 to alginate.**

| Sample | Total amount (ng) | Amount in supernatant (ng) | Loaded amount (ng) | Encapsulation efficiency % |
|--------|-------------------|----------------------------|--------------------|----------------------------|
| N=3    | 100               | 47.8 ± 8.6                 | 52.2 ± 8.6         | 52.2 ± 8.6                 |

$$y = (0.23865 + 0.86261) / [1 + (x/1.72709)^{2.70024}] - 0.86261$$

$$R^2 = 0.99912$$

**Standard curve of mouse FGF-2**

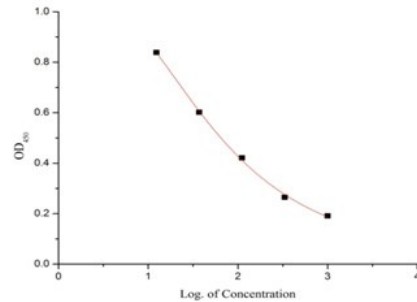

**Table S1. Loading efficiency of FGF-2 to alginate.** For drug loading, 100ng of FGF-2 was absorbed with 1ml 0.1% alginate and loaded into LBL coating of DPCs. After incubated for 15-20 min, the mixed solution was then centrifuged, and the supernatant that containing the unloaded protein was collected and tested by a microplate reader using FGF-2 ELISA kit. 1ml 0.1% alginate in PBS without FGF-2 was used as the control. The encapsulation efficiency was calculated by normalizing the loaded amount of protein to the total amount of added protein. The concentration of FGF-2 was calculated using the four parameter logistic nonlinear regression (4PL). The experiment was conducted in triplicates.

**Table S2. The density of hair follicles induced by implanted DPCs.**

| Group          | Number of Sample | Count of induced HFs |     |    | Inductive efficiency % |     |    |
|----------------|------------------|----------------------|-----|----|------------------------|-----|----|
|                |                  | ≤1                   | 2-6 | >6 | ≤1                     | 2-6 | >6 |
| DPC            | N=5              | 1                    | 0   | 0  | 20                     | 0   | 0  |
| DPC+FGF-2      | N=8              | 1                    | 2   | 0  | 12.5                   | 25  | 0  |
| LBL-DPC        | N=7              | 2                    | 0   | 0  | 28.5                   | 0   | 0  |
| LBL(FGF-2)-DPC | N=8              | 1                    | 2   | 2  | 12.5                   | 25  | 25 |

**Table S2. The density of hair follicles induced by implanted DPCs.** The inductive efficiency is defined as the percentage of positive hair-inductions to total experiments. The average count of hair follicles induced by LBL(FGF-2)-DPCs was greater than that of DPCs treated with FGF-2, demonstrating a higher inductive efficacy. LBL-DPCs and DPCs alone exhibited a relative low efficiency of hair follicle induction.

## **Supplementary Videos**

### **Supplementary Video 1**

A single DPC was observed by 3D scanning under bright field.

### **Supplementary Video 2**

A merged confocal scanning demonstrated a single DPC encapsulated with nano-coating, where a ultrathin matrices consisted of gelatin-FITC (green) and alginate-Rhodamine B (red) were shown around the cell surface. Nucleus was stained with DAPI (blue).

### **Supplementary Video 3**

A Merged 3D Projection of confocal image stacks exhibites a single DPC encapsulated with different fluorescence (green = gelatin-FITC; red = alginate-Rhodamine B; blue = DAPI).
